# Supplementary material for: The challenges of an in situ validation of a non-equilibrium model of soil heat and moisture dynamics during fires
Source: Copernicus journal article supplement (doi:10.5194/hess-2020-193), 2020-05-11
Supplement: Supplementary file [file hess-2020-193-AC7-supplement.pdf]

## Author's Final Response to Review Comments on HESS-2020-193

August 15, 2020

To handling editor: My thanks to you for your effort and to the three reviewers and M Novak for their comments, all of which have been helpful. I have indicated my major additions and clarifications in red, both in this response and the revised manuscript. In my response to the third reviewer and M Novak, I use the color blue to either ask a question to the commenter or to note a deleted sentence. I have also altered my online response to Y Zeng and the second reviewer. I have shortened my response to these two reviewers and I have added the exact line numbers of the revised manuscript where I have made changes in response to their comments. Unless otherwise noted by a specific response to a review's comment, I accepted all minor technical corrections without response. Finally, my response to all comments are in italics and follows a restatement of the reviewers' specific comment.

### \*\*\* Response to Comments from Yijian Zeng dated 20 May 2020 \*\*\*

**YZ - Line 46** Under the extreme dry condition alike in the desert, the top surface layer ( $\approx 1\text{mm}-1\text{cm}$ ) does not maintain local equilibrium hypothesis, this is also partially demonstrated by the papers as below:  
Zeng, Y., Z. Su, L. Wan and J. Wen, (2011): A simulation analysis of the advective effect on evaporation using a two-phase heat and mass flow model. *Water Resources Research*, 47(10), W10529, doi: 10.1029/2011WR01701.

Zeng, Y., Z. Su, L. Wan and J. Wen, (2011): Numerical Analysis of Air-Water-Heat Flow in the Unsaturated Soil Is it Necessary to Consider Air Flow in Land Surface Models. *Journal of Geophysical Research Atmosphere*, 116(20), D20107, doi: 10.1029/2011JD015835.

**RESPONSE - Line 46** *No Change made at this time. I understand Yijian Zeng's comment and would likely agree that his model "partially demonstrates that the top surface layer of soil in dry or desert conditions does not maintain local equilibrium". But the point I am making here is subtle and specific to the vapor source term,  $S_v$ . In Zeng's model there is no explicit formulation of the non-equilibrium source term. I may have misread the papers, but without the ability to directly compare the equilibrium vapor density or pressure with the same model variable I don't see how one can be sure about not maintaining local equilibrium. So given that the model does show non-equilibrium conditions how then can there not be a specific model of a vapor source term,  $S_v$ ? But, the differences between my model and Zeng's are potentially important and involve the details concerning how our respective models treat water vapor. I could not find common enough ground here to cite Zeng's suggested papers. But I do agree that citing one of the Zeng model papers is appropriate as I mention in my response to Zeng's last comment, Lines 565-567, below.*

**YZ - Lines 97-98** Could you explain a bit more on why this non-dimensional form of matric potential? What are benefits? Numerical stability?

**RESPONSE - Lines 97-98** *No Change made at this time. My non-dimensionalization of the matric potential,  $\psi$ , is purely idiosyncratic to me. To my knowledge there are no numerical benefits. I prefer the use of the matric potential in general (as opposed to pressure (Pa) or pressure head (m)) because it can be directly related to thermodynamic variables. I also prefer to emphasize the parabolic nature of the equation of mass conservation for liquid water and its similarity to the advective-diffusive equations (ADEs). So, the non-dimensionalization allows the physical dimensions of  $K_n$  ( $\text{m}^2\text{s}^{-1}$ ) and  $K_H$  ( $\text{ms}^{-1}$ ) to*

*be directly comparable to similar terms in ADEs. I am willing to include a sentence in the paper if the reviewer thinks that it would be helpful. My own feeling is that to do so would not benefit the paper.*

**YZ - Line 228** First time appearance - full spelling needed for a better readability.

**RESPONSE - Line 228** *A Minor Change was made. The revised manuscript now places quotes around the term BFD curve (i.e., Line 253 now reads “BFD”). Barnett (2002) gives no explanation of what the “BFD” actually means. Nor could I find any thing in any of his subsequent papers or any papers citing his original 2002 paper that provided any explanation. I note that the second referee also made the same comment.*

**YZ - Line 300-301** *Is there any specific reason for putting 40%? In other studies in desert environment, the soil vapor pressure is not saturated only for the very top soil surface layer, for the rest of soil profile, it is pretty much saturated (i.e., at 99%).*

**RESPONSE - Line 300-301** *No Change made at this time. In order to assure that everything is in equilibrium when the model (or fire) is “turned on” I assume that the soil vapor density and vapor pressure profiles are uniform and equal to my best guess as to what the ambient atmospheric vapor density or pressure would be at the measured ambient atmospheric temperature. So in this sense the 40% relative humidity is a bit arbitrary. I do agree that the soil relative humidity is likely to be much less near the surface than deeper into the soil. But including this in the initialization of the model would then mean that there is a vapor pressure/density gradient, and therefore, there would likely be some soil evaporation occurring. This is very likely the case, but under the circumstances of the fire any soil evaporation simply cannot be known or verified and so for the modeling purposes this extra level of detail is just ignored.*

**YZ - Line 409** *Could be this point more specific?*

**RESPONSE - Line 409** *A Change was made. Lines 454-457 now read: The design of this particular probe is fairly standard, but the material used to house the steel needles and the connectors attaching them to the coaxial (data/signal) cables had to continue operating and providing reliable data at temperatures exceeding 250 C. To ensure this external portions of the coaxial cables that were likely to be exposed to such high temperatures were wrapped in silicon tape.*

**YZ - Lines 565-567** *In the studies as mentioned in the desert environment, the inclusion of airflow increase surface evaporation 33% on the day right after rainfall event (<6mm).*

*Zeng, Y., Z. Su, L. Wan and J. Wen, (2011): A simulation analysis of the advective effect on evaporation using a two-phase heat and mass flow model. Water Resources Research, 47(10), W10529, doi: 10.1029/2011WR01701.*

*Zeng, Y., Z. Su, L. Wan and J. Wen, (2011): Numerical Analysis of Air-Water-Heat Flow in the Unsaturated Soil Is it Necessary to Consider Air Flow in Land Surface Models. Journal of Geophysical Research Atmosphere, 116(20), D20107, doi: 10.1029/2011JD015835.*

**RESPONSE - Lines 565-567** *A Change was made in Lines 626-627, in red below. Lines 623-627 now read: Additionally it would be worthwhile to include the dry air density,  $\rho_d$ , as a separate model variable. Certainly in any real fire the temperature and pressure of the dry air within the soil pore spaces would respond dynamically to heating. But including  $\rho_d$  as a dynamic variable should yield a more physically realistic simulation of the diffusional and advective transport of water vapor during the fire. The results of*

*Zeng et al. (2011) for less extreme conditions support this notion. Where I cite the second of the two Zeng et al. papers.*

\*\*\* Response to Comments from Anonymous Referee #2 dated 8 June 2020 \*\*\*

**Referee - 0a)** This manuscript makes novel and useful contributions toward an improved understanding of how soils are impacted by wildfire. But the contributions are actually much broader than that. This work addresses a number of key issues relevant to general topic of coupled heat and water flow in soils. As such, the work most certainly falls within the scope of Hydrology and Earth System Sciences.

**RESPONSE - 0a)** *Thank you and I hope this paper does reach a larger audience than just the fire science community.*

**Referee - 0b)** The manuscript is well written, the experimental work is described in sufficient detail, and the changes made to the HMV model are described clearly and with appropriate mathematical notation. The comparisons between the modified HMV model and the experimental data provide sufficient support for the interpretations and conclusions of this study. Although this manuscript is in excellent shape, the following issues need to be addressed before this manuscript is in suitable form for publication:

**RESPONSE - 0b)** *Thank you. The following should address your concerns.*

**Referee - 1)** The Abstract needs to be revised to include a description of the changes made to the forcing function and the parameterization of the surface energy balance. This is a major component of the study, yet receives no mention in the Abstract.

**RESPONSE - 1)** *A Change was made. Lines 11-13 now read: This study also (a) develops a general heating function that describes the energy input to the soil surface by the fire and (b) discusses the complexities and difficulties of formulating the upper boundary condition from a surface energy balance approach.*

**Referee - 2)** Lines 60-63: It is not clear how the parameterization of the surface energy balance was improved. On lines 243-244 we read that the surface energy balance formulation is slightly different than in the previous work, but it is not clear how this improved the parameterization of the surface energy balance. This requires clarification.

**RESPONSE - 2)** *A Change was made, as denoted in red. Lines 268-275 of the revised text now read:*  
*The energy balance at the soil surface used with the present study formulates the net infrared radiation loss at the surface as a balance between the outgoing and incoming infrared radiation. This is different from either Massman (2012) or Massman (2015), neither of which included the possibility of incoming environmental infrared radiation being absorbed by the soil's surface. Here the surface energy balance is expressed as*

*EQUATION (16)*

*where the '0' subscript refers to soil surface and the term on the left hand side of this equation is the energy absorbed by the soil (and assumes that absorptivity and emissivity of the soil are the same) and the first term on the right hand side is the net infrared heat loss (where the term  $\propto \epsilon_a(\rho_{va})T_{Ka}^4$  was not included in either Massman (2012) or Massman (2015)), ...*

**Referee - 3)** Lines 195-196: It would be appropriate to point out here that this observation differs from what Massman (2012) concluded regarding the effects of infrared radiation on soil thermal conductivity.

**RESPONSE - 3) A Minor change was made.**

*I believe that the reviewer is really referring to Massman (2015) because Massman (2012) does not include  $R_p$  or the infrared component of  $\lambda_s$  (the Bauer term) to which it is essential. So I will address the results of Massman (2015). Massman (2015) does not really conclude anything definitive about  $R_p$  except that the model did a better job at reproducing the Campbell et al. (1995) Quincy sand soil temperature observations if  $R_p$  were increased to  $4000 \mu\text{m} = 4 \text{ mm}$ , which is much greater than the default value of  $1000 \mu\text{m} = 1 \text{ mm}$  (see figure 1 of Massman (2015)). Otherwise even at  $R_p = 1000 \mu\text{m}$  Massman (2015) suggests that the Bauer term does not impact  $\lambda_s$  or the soil temperatures very much. So at this point there is really nothing to justify revising the paper.*

*Nevertheless, the following sentence now appears on Line 221: **Massman (2015) reached a similar conclusion.***

**Referee - 4)** Lines 533-534: The thermal conductivity model contains no explicit dependency on bulk density, but it does include porosity. Why not incorporate the effect of bulk density on conductivity via the effect it has on porosity, as was done for the WRC, hydraulic function, and the source term? This seems rather odd to me. Is there a reason why such an approach would not (or perhaps did not)? If so, that certainly needs to be addressed in the text of the manuscript.

**RESPONSE - 4)** *A Change was made, in red below. The change in porosity was included in the change in thermal conductivity. My original wording was did not clearly state this to have been the case. I have altered the manuscript to indicate that the thermal conductivity also changed with the change in bulk density. And the referee is correct that it is the soil porosity that changed with the change in bulk density. Lines 581-589 now read:*

*“The following model parameters were changed for this sensitivity analysis to feedbacks: soil bulk density increases from  $1.30 \text{ Mgm}^{-3}$  to  $1.46 \text{ Mgm}^{-3}$  (a 12% increase as per figure 1); **simultaneously** the thermal conductivity of the mineral fraction,  $\lambda_{m0}$ , increases from  $4.42 \text{ WmK}^{-1}$  to  $8 \text{ WmK}^{-1}$ , the de Vries shape factor,  $g_a$ , decreased from 0.123 to 0.06, the Campbell et al. (1994) parameter  $q_{w0}$  (which determines when water content starts to influence the soil’s thermal conductivity) decreased from 0.03 to 0.02, the soil’s volumetric specific heat increases by 10% (in accordance with the observations made by Butters (2009)), the overall soil thermal conductivity,  $\lambda_s$ , increases by 15%, and finally the source term coefficient,  $S_*$ , decreases from 0.1 to 0.08 (specifically chosen to be a 20% decrease). This increase in bulk density yields a concomitant decrease in soil porosity,  $\eta$ , which is simply carried over in a purely linear fashion to **the soil thermal conductivity**, the WRC, the hydraulic function, and the source term,  $S_v$ .”*

Technical corrections:

**Referee - Line 228:** What does BFD stand for?

**RESPONSE - Line 228** *Yijian Zeng also asked the same question. My response to him is:*

*A Minor Change was made. The revised manuscript now places quotes around the term BFD curve (i.e., Line 253 now reads **“BFD”**). Barnett (2002) gives no explanation of what the “BFD” actually means. Nor could I find any thing in any of his subsequent papers or any papers citing his original 2002 paper that provided any explanation.*

**Referee - Lines 452-453:** This sentence requires clarification. To understand the context of this statement,

it would be useful to know how much vertical structure in  $\lambda_s$  is included in the model.

**RESPONSE - Lines 452-453** A Change was made. The following sentence was added (Lines 502-504):  
*This could easily be the case for MEF soils because the present model of  $\lambda_s$  does not include any of the observed vertical structure in soil bulk density or its relationship to the vertical structure of the soil's thermal conductivity (Massman et al., 2008).*

**\*\*\* Response to Comments from Anonymous Reviewer #3 dated 31 July 2020 \*\*\***

**Reviewer - 0a** The paper is well written and clearly structured. I enjoyed reading the manuscript and find much of the work is explained such that it is also understandable for those without a background in fundamental soil physics. I think it is appropriate for HESS readership.

**RESPONSE - 0a** *Thank you.*

**Reviewer - 0b** I have two major comments and several others, included below.

**RESPONSE - 0b** *I hope the following response should address your concerns and comments.*

**Reviewer - 1** A first main comment is regarding the framing of this work to aim to model soil temperatures in fires, but being only validated in one burn, and a very specific one. The manuscript could benefit from more careful explanation of the differences between various types of fire and the implications for this for the modeling performed.

**RESPONSE - 1** *OK*

**Reviewer - 1a** L32: Please update this sentence to clarify you are talking about slash pile burns, and cite work that supports your statement. Prescribed burns that use moving fire fronts rather than static pile burns typically have fire residence times of mere minutes and usually take place when soils are wet, usually keeping mineral soil temperatures very low or barely changed. Somewhere in this intro it would also be good to explain what slash pile burns are and how they differ from moving fire fronts in prescribed and wildfires in terms of residence time and soil heating.

**RESPONSE - 1a** *I removed the following sentence (including Line 32) “Unfortunately for soils, managing fuels often takes the form of biomass burning (i.e., prescribed burns), the consequences of which for the affected area can be as bad as or even worse than wildfire.” I have added the following sentences (Lines 36-51) in an effort to address the reviewer’s concern about how fires differ and how my model might be used to investigate the impact of both static and dynamic fires. **The benefit of a model lies with the ability to vary amount and duration of heating (e.g., [Steward et al. (1990)]) that characterize different fire types and to better judge how fire impacts different soil types; and just as there are a variety of different soil types with differing thermophysical properties, there are also a variety fire types, characterized by duration and intensity (energy or soil heat flux). For example, prescribed burning of understory vegetation, an example of spreading or dynamic fire used to reduce understory fuels, is usually low intensity and will heat the soil for only a few minutes. But as the fuel loading increases so does the fire’s duration and intensity (e.g., [Massman et al. (2003)]). On the other hand, prescribed slash pile burns, like the one studied here, are static fires that can heat the soil with 1-10 kWm<sup>-2</sup> for 10’s of hours (e.g., Massman and Frank 2004; Massman et al. 2008). Wildfires, and crown fires in particular, are dynamic and often fast moving and relatively brief by comparison to slash pile burns, but they can also be extraordinarily intense (10-100 kWm<sup>-2</sup>). Furthermore, this type of fire can cause burning material, e.g., tree boles or other woody material, to come into direct contact with the soil and then continue to burn or smolder for long after the fire front itself has passed. This is the worst of all possible situations because whatever impacts the dynamic portion of the fire may have had on the soil will only be made much worse (at least to the area surrounding the point of contact). With the present modeling approach it makes it relatively easy (just by changing the model’s soil surface boundary***

*forcing) to estimate the depth of penetration of critical temperature thresholds (e.g., Massman et al., 2010, figure 1) for differing soil types.*

**Reviewer - 1b** L62: please discuss somewhere (probably in the discussion) how the results of your work are applicable in dynamic (not static) fires like moving fire fronts, especially given the fact that you describe that heating processes differ between static and dynamic burns (L 215) and that the model was only validated with data from static fire, but that your aim was to model soil temperatures during fires (plural, L441)?

**RESPONSE - 1b** *I have tried to address this issue with the changes I described in my RESPONSE - 1a above.*

**Reviewer - 1c** L341: What is the rationale of calibrating this model on a slash pile burn site and not in a moving fire front?

**RESPONSE - 1c** *The model has been calibrated against 10 other fires, two of which were moving fire fronts. All fires were instrumented with soil temperature measurements. But only this 2004 MEF fire had soil moisture measurements. One other MEF fire (2002) had soil heat flux measurements. Otherwise no other fire included soil heat flux measurements. The soil moisture and heat flux measurements are extremely important for evaluating the model's performance and formulating the upper boundary forcing. So I focused the present manuscript on the 2004 burn. I could certainly add a comparison of modeled and observed temperatures during the moving fire front experiment to the present manuscript. But I am not sure if there is anything new to be learned from doing so. **On a personal note: I am not sure what the reviewer's question has to do with (the original) Line 341, which just states that there is no information for modeling  $K_R$  at the MEF burn site?***

**Reviewer - 1d** Line 513: Discuss here whether these soil changes are likely to occur or not in wildfires and prescribed fires that have moving fire fronts. I agree with this being relevant for static burns but this paragraph needs context regarding the likelihood of this happening in other types of fires. In light of that, which types of fires do require this explicit inclusion of dynamic feedbacks? The current text makes it seem that all fire is the same, which is too simplistic.

**RESPONSE - 1d** *Lines 564-579 now read: **Although this statement should self-evident, it is probably more precise to say that changes to the soil result from the integrated effects of the surface heat flux (delivered to the soil), the area of soil in contact with or influenced by the fire, and the duration of the fire. That is the probability of change to soil due to fire is  $\propto \int_0^{t_d} \int^{Area} G(z = 0, Area, t) d(Area) dt$ . This more precise approach clearly suggests that changes to the soil are more likely to occur during spatially static fires (e.g., slash pile burns or relatively low intensity but long duration burning biomass) than during a fast moving dynamic fire (grassland or low shrubland fire) of moderate or even high intensity. Intermediate between these two extremum case is the relatively fast moving, but extremely high intensity, crown fire.** These additional sentences are basically meant to rephrase in a more precise way the statement I added to the Introduction, i.e., Lines 36-51 as discussed above in my Response - 1a to this reviewer. I also think it is possible to infer from Lines 564-579 that I may have a slightly different view on fires and how they can impact soils than that held by the reviewer. I do not necessarily agree that the original manuscript was "simplistic [by making] all fire [seem] the same." I explained at length about how formulating the upper boundary condition was difficult and could easily vary with different fire types. In the*



*section on the upper boundary condition and the surface energy balance does distinguish between static and dynamic fires. But within a modeling context some simplification is necessary and ultimately imposed by the need to formulate (as much as possible) simple, realistic and tractable boundary conditions.*

**Reviewer - 2** My second main comment is regarding the goal of this study to provide a tool to support management (L596). I wonder about both the inputs to this model and the ease at which others can use this model. As far as I know there is not a simple model (or model at all) available online that allows prediction of soil temperature curves given a set of soil properties and fire duration. It is good that the MATLAB code will be released but that will only be accessible to a very select group of people, also within science. Release of the model as an R package or as R shiny could considerably increase its potential use amongst scientists and R shiny may make it available to those outside of science. I think there is great potential for this that would increase the impact of this work. Related to that, it was not entirely clear to me how broad a range of input data is needed to run the model for easy use. Are all the complicated parameters needed or can the model be run just with information on readily available soil characteristics like texture, bulk density and organic matter content, and that the software does the rest? That would also considerably increase the accessibility of this work for further use.

**RESPONSE - 2** No change was made at this time. Sorry if this response may seem inadequate. But altering the manuscript at this time seems a bit premature to me. Here is why I think so:

*The model has been recoded in to C and incorporated into version 6.7 (and later versions) of the US Forest Service's First Order Fire effects Model (FOFEM). The model is available to anyone who wishes to use it. The installer is available at <https://firelab.org/document/fofem-files> and the direct link to the installer, which will change when the next version of FOFEM is released, is available at [https://www.firelab.org/sites/default/files/images/downloads/FOFEM\\_6-7\\_Install.zip](https://www.firelab.org/sites/default/files/images/downloads/FOFEM_6-7_Install.zip). The GUI displays all the input variables the user needs to supply. We have tried to keep most of the model's complexity hidden from the user.*

*But note: (1) The version of the HMV model accessible through these web links does not include the ability to switch between surface energy balance formulations as done for the sensitivity analysis discussed in the present manuscript. (2) Nor does it include the adjustment,  $Q_{Fin}$ , for the initial disequilibrium in the infrared radiation. (3) Updating the HMV model FOFEM code should be possible as long as they are compatible with any budgetary constraints. (4) A paper describing the FOFEM implementation of the HMV model is currently in preparation after about a year's delay. I had hoped that the FOFEM-HMV paper would have preceded the present manuscript. (5) At present I am unaware of any plans to re-code the HMV model in any other computer language.*

Additional comments:

**Reviewer - 3a** L39: can you clarify here what the need is for an updated model? What has gone wrong with the previous model and what is the risk of using the previous model without the changes proposed here? Are temperatures off, or does it not work in a specific soil type or moisture conditions, and by how much are the temperatures off? I.e. can you explicitly mention the improvement that is made to modeling soil temperatures zooming out from the fact that the equations may be more accurate?

**RESPONSE - 3a** *The reviewer's question is in many ways the subject of the discussion between M Novak and myself. Without going into my detailed response to M Novak, my answer here to third reviewer is:*

The changes to  $S_v$ , see Equation (9), make only a small change to the model's performance. M Novak argues from his 2019 paper that this should be the case and I confirmed it by making several tests runs of my model. In the case of the double counting of the soil's apparent thermal conductivity, it does make a difference to how the model distributes the incoming energy between soil storage ( $C_s \partial T / \partial t$ ) and heat conducted to deeper layers of the soil ( $-\lambda_s \partial T / \partial z$ ). But in calibrating my model I adjusted  $\lambda_{m0}$  (see Lines 189-200 for a definition and discussion of  $\lambda_{m0}$ ), which would have disguised any differences between before and after dropping the double counting. The intent of the present paper is to discuss the model performance relative to the in situ observations made during the 2004 fire. I have no intent of exploring the consequences of misusing the apparent thermal conductivity in the present study. But note: (1) a colleague and I may explore this subject in a later paper and (2) M Novak speculates a bit more on the changes in soil temperature associated with eliminating the apparent thermal conductivity.

Nonetheless, I revised the Abstract (Lines 6-11) to read: "Improvements to the model eliminate two important (but heretofore universally overlooked) inconsistencies: one that describes the relationship between evaporation and condensation in the parameterization of the non-equilibrium vapor source term and the other, is the incorrect use of the apparent thermal conductivity in the soil heat flow equation. The first of these **made a small enhancement** in the stability and performance of the model. The second is an important improvement in the **physics underpinning the model**, but had less of an impact on the model's performance and stability than the first."

So basically my purpose in the present manuscript in regards to these two changes to the model is to point out that they important because they improve the basic physics underlying the model. But their impact on the performance is small in part by "re-tuning" the model parameters to the data ( $S_*$ ,  $\lambda_{m0}$ ) and in part by the nature of the changes and parameterizations themselves ( $S_v$ ).

**Reviewer - 3b L49:** what are these less extreme conditions, just diurnal fluctuations?

**RESPONSE - 3b** Line 65 now reads: "also demonstrates (under less extreme conditions than during fires, **i.e.,  $0 < T \leq 60 \text{ C}$** )". Also note: I believe M Novak in his comment on the first version of my manuscript would claim that his results apply equally to conditions that occur during fires as well. I address this issue in my response to him and so will refer the reviewer to M Novak's comment and my response, if he is interested in these matters.

**Reviewer - 4 L141:** How does this work in wetter soils? In temperate regions fires typically occur in Spring when soils are wet. Is the model valid then as well? If so, is there a potential error because of this assumption?

**RESPONSE - 4** I am not sure to what the reviewer's question is referring. So I will provide two answers in the hope that one is correct.

(a) The source term,  $S_v$ , works the same way in either wet or dry soils because of how  $A_{wa,dry}$  is defined. It is only for very dry soils that  $A_{wa,dry}$  differs from  $A_{wa}(\theta)$  because condensation should be able to occur with or without soil moisture being present. But, does this asymmetry in  $A_{wa}(\theta)$  and  $A_{wa,dry}$  have any impact on the model simulation or performance? No, the consequences are minor. Lines 6-11 (Abstract) now read "Improvements to the model eliminate two important (but heretofore universally overlooked) inconsistencies: one that describes the relationship between evaporation and condensation in the parameterization of the non-equilibrium vapor source term and the other, is the incorrect use of the

apparent thermal conductivity in the soil heat flow equation. The first of these *made a small enhancement in the stability and performance of the model.*” I refer the reviewer to M Novak’s comment and my response, if he/she would like a more detailed discussion.

*(b) But if the reviewer is asking what are the potential consequences of water vapor that is transported to cooler parts of the soil and then condensing on wet soil surfaces, then yes there is potential for a model instability. An instability will occur whenever the modeled soil moisture,  $\theta$ , exceeds the air filled porosity,  $\eta$ . In other words, the model cannot accommodate the possibility that the soil exceeds fully saturated, i.e.,  $S_w > 100\%$ .*

**Reviewer - 5** L299: how realistic is it that the initial soil temperature is uniform with depth and how would a change in this approximation alter the model outcome?

**RESPONSE - 5** *No change was made. The assumption of a uniform initial soil temperature is just a convenient way to initialize the model. It really has no significant impact on the predicted temperatures because, in general, the soil temperatures of the greatest interest during a fire are likely to far exceed the initial soil temperatures. Otherwise the overhead required to initialize the model, either from observation or simulation, with a realistic profiles of temperature and soil heat flux seems unnecessarily high.*

**Reviewer - 6** L356: to make this info more accessible for a European readership please include the name of this soil type using the FAO WRB system (World reference base for soil resources, [https:// . . .](https://...)

**RESPONSE - 6** *A change was made. Thanks for pointing out the FAO soils document. The soil classification given in the text, “deep (> 1.0 m), fine-loamy, mixed, frigid, Pachic Argiustoll” was determined in 2003 by a US Forest Service soil scientist after she and I spend a day sampling the area within and near the burn site. I am not a soil scientist and have no first hand knowledge of soil classification schemes. But I was able to get help from Dr. Curtis Monger (National Leader Soil Survey Standards, USDA-NRCS National Soil Survey Center, Lincoln, NE). His statement is “**The mollic keys out before the argillic, so the argillic horizon is signified by the Luvisol principle qualifier. Having a mollic, the soil might have keyed out as a Chernozem if it were dark enough or Kastanozem if not, but both of those soil types require a calcic. Therefore, the Reference Soil Group is a Phaeozem. Other than the overly thickened mollic, the soil had no special features, such as redoximorphic features, shrink-swell, etc.. Therefore, the only supplementary qualifier would be pachic shown in parentheses.**” Line 402 now reads: “deep (> 1.0 m), fine-loamy, mixed, frigid, Pachic Argiustoll *(or Luvisol Phaeozem (Pachic) [FAO UN (2014)]*)”.*

**Reviewer - 7** L358: suggest replacing soil organic material by soil organic matter, and please indicate the depth across which this organic matter percentage is valid.

**RESPONSE - 7** *Lines 405-406 now read: “Soil organic **matter** comprises about 1-2% of the soil by **mass and is more or less uniform through at least the top 10 cm of soil [Jiménez Esquilín et al. (2008)]**”. For the purposes of completeness: The soil surface throughout MEF is patchily covered with a very thin duff layer. I can add this last sentence to the manuscript if the reviewer thinks it is valuable to do so.*

**Reviewer - 8** L360: I don’t understand, how can grazing and harvesting disturb the soil, do you mean the very soil surface? Or were there very deep ruts or something? I can imagine this affects soil cover but not the soil. Maybe good to indicate to which depth this disturbance occurred.

**RESPONSE - 8** No change was made. My understanding is that grazing and logging largely compact the soil, therefore these activities are not just surficial disturbances. But I am afraid I cannot really quantify any potential impacts by depth. I have never sampled any undisturbed areas within MEF. The soil bulk density profiles I do have indicate that the top 20 cm or so are more compacted than the deeper layers, but I know of no study or method that could say what might be natural background bulk density changes and what might be caused by logging and grazing.

**Reviewer - 9** L402: I'm intrigued, could you explain how it could never have been measured during a fire? Never at all or never during the fire?

**RESPONSE - 9** Line 449 now reads: "*this or any fire*". In situ measurements of  $\lambda_s$  (at least those I am most familiar with) usually require delivering an electrical pulse to (and thereby heating) a 12-13 cm long stainless steel needle and measuring the temperature rise and fall during and after the pulse has been delivered. The rate of rise or fall of the temperature is related to the thermal conductivity of the medium. If the medium has a relatively low thermal conductivity (i.e., it is acting more as an insulator than a conductor), then the needle's rise rate will be steep because the heat cannot be conducted away from the needle surface very efficiently, and of course just the opposite if the medium is a good conductor of heat. During a fire I think the signal to noise would be so great that the chances of detecting the small, local and fairly fleeting temperature signal from the needle would be nearly zero. Another issue is that the electronics of most thermal conductivity probes are not designed for such high temperatures and (from our experience) the real possibility of significant ground currents occurring during fires. On the other hand, it would be fun to consider designing and building an instrument to measure  $\lambda_s$  during fires.

**Reviewer - 10a** L452: include info on how realistic it is that the sensor was indeed installed at this other depth. And how were sensor depths determined, before or after fire? How accurate are they?

**RESPONSE - 10a** Lines 498-492 now read: "*The (relatively significant) overestimation by nearly 60 C of the 2 cm soil temperatures is not fully understood, but it may be a consequence of mis-measurement of the installation depth of the soil temperature sensors and/or poor contact with the soil, meaning that the soil air in contact with the temperature sensor would be acting as an insulator relative to the heat conducting soil particles in contact with the sensor*". I don't think further discussion of this issue is really warranted in the manuscript, especially with the additional comment about poor contact with the soil as a possible explanation for the underestimation of the model predictions. But, for the sake of answering all the reviewer's queries: (1) Installing these sensors by hand using a ruler (which is how I did it) is somewhat imprecise. I estimate the error associated with this approach to measuring the installation depth is  $\pm 0.2$  cm, meaning that I never really convinced myself that I could have missed the measurement depth by over half a centimeter. (2) We removed the sensors about 3 years after the burn and, as much as we could, we did try to check the installation depths of all the sensors. This did resolve a few measurement mysteries, but nothing regarding this particular temperature sensor. (3) The precisions of these sensors is less than 0.5 C, implying that it is unlikely there is anything inherently wrong with the sensor.

**Reviewer - 10b** Related to a previously posted reviewer comment: for accessibility and ease of use it would be helpful if the model input uses bulk density rather than porosity since bulk density is more easily available from soil databases. And does the model allow for bulk density to vary with depth? That would be useful given the typical increase of soil bulk density with depth.

**RESPONSE - 10b** Lines 127-129 now read: “*(note:  $\eta$  is obtained from the soil’s bulk density and particle density, which are the actual model input variables, and because both these variables are assumed to be constant and uniform, so also is  $\eta$ )*”. The model is coded in such a way that it is fairly easy to include variable soil bulk density, but I have not created a specific option for inputting variable soil bulk density profiles.

# Bibliography

- [FAO UN (2014)] FAO UN (Food and Agricultural Organization of the United Nation): World reference base for soil resources 2014, World soil resources report no. 106, Rome, Italy, ISBN 978-92-5-108369-7 (print), E-ISBN 978-92-5-108370-3 (pdf), 2014.
- [Jiménez Esquilín et al. (2008)] Jiménez Esquilín, A. E., Stromberger, M. E. and Shepperd, W. D.: Soil scarification and wildfire interactions and effects on microbial communities and carbon, *Soil Sci. Soc. Am. J.*, 72, 111–118, doi:10.2136/sssaj2006.0292, 2008.
- [Massman et al. (2003)] Massman, W. J., Frank, J. M., Shepperd, W. D., and Platten, M. J.: In situ soil temperature and heat flux measurements during controlled burns at a southern Colorado forest site, in: *Fire, fuel treatments, and ecological restoration, Conference proceedings: 2002 16-18 April, Fort Collins, CO.*, edited by Omi, P. N, and Joyce, L. A., USDA Forest Service Proceedings RMRS-P-29, 69–87, <http://www.fs.fed.us/rm/pubs/rmrs.p029.pdf>, 2003.
- [Steward et al. (1990)] Steward, F. R., Peters, S., and Richon, J. B.: A method for predicting the depth of lethal heat penetration into mineral soils exposed to fires of various intensities, *Can. J. For. Res.*, 20, 919–926, doi:10.1139/x90-124, 1990.

**\*\*\* Response to Comments from Michael Novak dated 15 June 2020 \*\*\***

**General comments**

**MN - 1** This manuscript is the third in a series on modeling soil heat and moisture dynamics under extreme surface heating associated with forest fires or prescribed slash pile burns. The first two papers (Massman, 2012, 2015) compared model results with a laboratory simulation of surface fire (Campbell et al., 1995). According to the Abstract the coupled heat and moisture model developed by the author is improved in two main ways: (1) the formulation for the non-equilibrium vapor source term,  $S_v$ , is modified for extremely dry soil moisture content and (2) the apparent thermal conductivity is no longer used in Fourier's law in the soil heat flow equation because that resulted in the double counting of thermal vapor transport (de Vries, 1958). Additional changes to the Massman (2015) model not highlighted in the Abstract are also detailed. The manuscript describes a slash pile burn field experiment carried out in a pine forest in Colorado and compares the latest model version to the field measurements (showing moderate to good agreement for the variables of greatest interest). Final sections discuss sensitivity analyses, the potential for future fire studies, and a summary.

**RESPONSE - 1** *As per anonymous referee #2 I have added a sentence (Lines 11-13) to the abstract to detail the additional changes to the Massman (2015) model that are not included in the first version of the abstract.*

**MN - 2.1** Explicit formulation of an expression for  $S_v$  is required in so-called non-equilibrium versions of the Philip and de Vries (1957) theory, including those with the well-known extensions detailed in de Vries (1958, 1987\*) and Milly (1982\*). Until relatively recently all Philip and de Vries type theories in the soil physics literature were formulated with the assumption of local phase equilibrium between liquid water and its vapor throughout the soil domain even though it is recognized that for evaporation/condensation to occur in a soil pore such an equilibrium cannot be exactly true. In these equilibrium versions  $S_v$  is determined implicitly and only one partial differential equation, with corresponding boundary and initial conditions, is required to simulate soil moisture flow compared to two for a non-equilibrium version. Recently Smits et al. (2011) and Trautz et al. (2015) claimed significantly better simulation of cumulative evaporation and soil moisture content with similar non-equilibrium versions. Massman (2015) also made such a claim when updating the Massman (2012) model which assumed equilibrium. In the current manuscript it is indicated that the latest improvements to  $S_v$  "enhanced the stability and performance of the model" although neither the current nor the 2015 paper makes a direct comparison between equilibrium and non-equilibrium predictions. Novak (2019), which followed on Novak (2012), was devoted to a detailed investigation of the non-equilibrium formulation and the results of modeling moisture and heat flow with and without it.

**RESPONSE - 2.1** *A change was made.* *In my 2015 paper I was basically referring to the 2012 version of the model as the equilibrium model. To compare the results of 2015 non-equilibrium model with those of the 2012 equilibrium model requires comparing the corresponding figures in each paper. But the 2015 model includes soil moisture hydraulic functions and the 2012 model did not. I should have given more credit in my 2015 paper for the improvement in the non-equilibrium (2015) model's performance to the inclusion of these hydraulic functions. Finally, I also note that others (Borujerdi et al. (2019) and Ouedraogo et al. (2013)) besides Smits (2011), Trautz (2019) and myself have also reported improved modeling results with a non-equilibrium approach and all of these models include hydraulic functions. Nonetheless, after considering M Novak's comment, I made several tests with the model and have modified*

the statement in the Abstract (Line 9) to read “*made a small enhancement in the stability and performance of the model*”.

**MN - 2.2** It was mainly prompted by the realization that if recent claims about the importance of non-equilibrium are true then all previous investigations of soil evaporation (and other phenomena in soil physics) that assumed equilibrium are invalid.

**RESPONSE - 2.2** *I am not sure how M Novak arrived at this conclusion. I don't see how the non-equilibrium approach invalidates over 60 years of scientific insight resulting from the equilibrium approach.*

**MN - 2.3** The relevant Novak (2019) findings can be summarized as follows: (1) in a soil drying under natural conditions or due to fire evaporation begins at the soil surface but eventually moves steadily deeper into the soil with the phase change occurring within a very narrow frontal-type evaporation zone (at most a few mm wide), (2) a dry layer in which moisture flow is dominated by upward vapor diffusion exists above the evaporation front and relatively wet soil in which upward liquid flow dominates exists below it, (3)  $S_v \approx 0$  everywhere outside the evaporation zone (especially true in the dry layer; a small amount of condensation driven by the soil thermal gradient exists in the wet layer but the values are several orders of magnitude smaller than those at the front), (4) there is no discernible difference for all dependent variables (and corresponding fluxes) between the non-equilibrium and equilibrium version models everywhere outside the narrow evaporation zone, (5) the intrinsic resistance (Shuttleworth, 1975\*) associated with Hertz-Knudsen dynamics is 2–3 orders of magnitude smaller than the within-pore diffusion resistance that governs a proper physically-based formulation for  $S_v$  and can therefore be neglected, (6) avoiding the imposition of equilibrium at the soil surface during drying, which in principle is required within a fully non-equilibrium model, is more difficult in practice due to numerical instability; imposing equilibrium at the bottom boundary of the soil domain, if deep enough so that little change occurs, and in the initial condition is physically realistic.

**RESPONSE - 2.3a** *No response seems to be required here; but (a) The simulations of [Başer et al. (2018)] (see their Figures 12b and 12c) suggest that  $S_v$  can be non-zero (i.e.,  $\rho_v \neq \rho_{v,e}$ ) for several centimeters in both the horizontal and vertical dimensions, contrary to M Novak's conclusion (3); (b) thanks for reminding me of [Shuttleworth (1975)]; (c) I also prefer a “physically-based” approach to formulating  $S_v$ ; and (d) I am less certain than M Novak about what constitutes a “proper” (or by implication an “improper”) approach to modeling  $S_v$ .*

**RESPONSE - 2.3b** *A change could be made & A change was made.* *But I think it would be helpful to discuss how I conceptualize  $S_v$  because it seems to be somewhat different than M Novak's. But first, M Novak and I do agree that  $S_v$  should be constructed as the product of a soil specific surface area ( $A_{wa}$  = surface area within a sample volume divided by the volume of that sample) and an exchange flux between the pore volume and the surface bounding that volume,  $F_{pore}$ . Novak (2012, 2019) models  $F_{pore}$  as a diffusive flux, i.e.,  $F_{pore} \approx D_e(\Delta\rho_v/L_p)$ , where  $D_e$  is related to the coefficient of diffusion,  $\Delta\rho_v/L_p$  is the bulk mass density gradient,  $L_p$  is some characteristic pore length scale and  $\Delta\rho_v$  is the difference between the equilibrium vapor density,  $\rho_{v,eq}$ , and the pore vapor density,  $\rho_v$ . In my view  $S_v$  should capture other important surface-mediated effects than just specific surface area, so I model  $F_{pore}$  with the Hertz-Knudsen Equation. In fact, using the Hertz-Knudsen approach to describe surface-air interfacial interactions (and therefore potentially the interfacial intrinsic resistance) is common (e.g., [Shuttleworth (1975)], [Clifton et al. (2020)]). But my approach to modeling  $F_{pore}$  does not include any*



possible diffusive boundary layer effects, which could be an important consideration for advective flows. Rather my formulation of  $S_v$  does include an adjustable parameter,  $S_*$ , which because  $0.01 \leq S_* \leq 0.1 < 1$  should act to compensate for the lack of any explicit boundary layer effects. I chose not to include possible boundary layer effects to help keep  $S_v$  as simple as possible. I am willing to include this clarification in the manuscript, if the editor or the reviewers find it helpful. But otherwise comparing the magnitude of the within-pore boundary layer resistance to any intrinsic interfacial resistance is well beyond the intent of the present study. Nonetheless, this issue did prompt me to make further model test runs, which led to the following change to the manuscript on Lines 171-172: “**0.01  $\leq S_* \leq$  0.1, the specific value being dependent upon the time step used for a model run, . . .**” .

**RESPONSE - 2.3c** Further change could be made. But there are other aspects to M Novak’s model of  $F_{pore}$  that are worth pointing out here. [Skopp (1985)] provides a good summary of the basic assumptions and logic behind the diffusive model of  $F_{pore}$  championed by M Novak. (Note: [Skopp (1985)] develops a model of the uptake of oxygen by moist surfaces of soil particles. Nonetheless, the general approach he follows can be applied to  $S_v$  – or to any gas for that matter.) For the present purposes the salient assumptions for the [Skopp (1985)] model are that (1)  $F_{pore}$  is diffusive only (i.e., no advection is occurring) and (2) the pore gas phase concentration is at a steady state (i.e., that the storage term,  $\partial\rho_v/\partial t = 0$ ). My model makes neither of these assumptions, which already suggests that the diffusive  $F_{pore}$  is not necessarily consistent with my approach. Of course, that does not preclude incorporating M Novak’s model for  $F_{pore}$  into my model, but I chose not to pursue this in the present study. Furthermore, I have already proposed including a discussion of the boundary-layer effects associated with advective flows.

**RESPONSE - 2.3d** Further change could be made. But the steady state assumption is a different story. In his comment 8.4 below M Novak counsels that storage ( $\partial\rho_v/\partial t$ ) may not be negligible during fires. My model runs suggest that it is important during fires, which is evidenced by the vertical profiles of soil vapor density and pressure (Fig. 1 below). I included similar plots in both the 2012 (paragraph [43] beginning with “Figure 8 ...”) and 2015 (pps. 3671–3672 beginning at the paragraph starting with “Figure 7 ...”) papers. So it seems reasonable to include Fig. 1 in the present manuscript. My concern in the two earlier papers (and shared to a certain extent in the present paper) is that the model predictions for vapor density and pressure seem higher than I would expect or intuit. I am willing to revise the manuscript to incorporate Fig. 1 and more discussion, if the editor and reviewers should find it helpful to do so. But there is more to this story as I point out in my Responses 3.1 and 3.2 below.

**MN - 2.4** The Novak (2019) results show clearly that the numerical implementations of the heat and moisture transport equations in Smits et al. (2011) and Trautz et al. (2015) were flawed and their conclusions about the importance of and the necessity to use non-equilibrium models were incorrect.

**RESPONSE - 2.4** As I said in my online response to Yijian Zeng I don’t really intend to critique anyone else’s model. Nonetheless, I certainly did not conclude after reading Smits et al. (2011) or Trautz et al. (2015) that they had suggested that a non-equilibrium approach was “necessary” for modeling soil evaporation. I also observe that Novak (2012) and Smits et al (2012) debated some of the objections that M Novak had raised about the approach Smits et al. (2011) took when exploring the non-equilibrium model.

**MN - 3.1** Therefore, while the implementations of a non-equilibrium version of heat and moisture flow in Massman (2015) and in the new manuscript are not incorrect in principle, if done correctly, there is clearly

no advantage to doing so despite the author's perception of better performance in both cases (never actually shown).

**RESPONSE - 3.1** *I agree that my version of  $S_v$  is “not incorrect in principle”. There are two improvements in model performance that resulted from what appears to be a relatively small change in the parameterization of  $S_v$ . The model was more robust to (or less prone to instabilities with) (1) increases in the time step and (2) changes in parameter values or functional forms of the relative hydraulic function,  $K_R$ . Both these are important, even if relatively small. But I don't think they are worth discussing.*

**MN - 3.2** True differences between the equilibrium and non-equilibrium models that do exist within the narrow evaporation zone (as shown in Novak, 2019) are unobservable and have no bearing on the objectives stated in the Introduction to the new manuscript with regard to effects of fire on soil.

**RESPONSE - 3.2** *A change could be made.* *My model explicitly includes vapor storage ( $\partial\rho_v/\partial t$ ), whereas Novak (2019) assumes that it can be neglected and therefore implicitly assumes steady state conditions, i.e.,  $\partial\rho_v/\partial t = 0$ . Allowing for storage in my model yields vertical profiles of vapor density that can approach atmospheric density at one standard atmosphere and vapor pressures that can exceed pressures of one standard atmosphere. Further these profiles extend well outside the evaporation zone and, therefore, they could (at least theoretically) be detectable outside that much smaller region. It is still an open question (at least to me) as to whether such profiles are physically realistic, a point I made in Massman (2015: pages 3671–3672) when discussing 2015 model's predictions. On the other hand, high values of  $\rho_v$  and  $e_v$  have also been reported with non-steady state equilibrium models of intense heating of permeable medium, e.g., [Dayan (1982)]. It seems to me that the only way to truly test for possible differences between equilibrium and non-equilibrium models during fires (and maybe under less extreme conditions as well) would be to assume non-steady state conditions and a Darcian velocity that could result from any rapid changes in vapor pressure gradient associated with possible rapid evaporation rates, e.g., [Udell (1983)], [Pakala and Plumb (2012)], and Fig. 1 below. One could also test for possible differences between steady state, but otherwise identical, versions of equilibrium and non-equilibrium models. M Novak's 2019 results and conclusions notwithstanding, at this point I am not entirely convinced that the case for very little difference between equilibrium and non-equilibrium models has been conclusively proven (at least with applications to fire). Again I would be happy to include more discussion on this point in the revisions, if the editor and reviewers feel it would be helpful.*

**MN - 3.3** Furthermore a non-equilibrium model requires greater programming labor, is more complex, has longer computation times, and has greater potential for programming error and numerical instability.

**RESPONSE - 3.3** *Yes, the more complex the model the longer the execution times and the greater the risk of a programming error.*

**MN - 4** The  $S_v$  formulation actually used based on the Hertz-Knudsen Equation [line 126, Eq. (8)] is incomplete since the much larger within-pore diffusive resistance that exists is neglected, implicitly resulting in a smaller resistance which would bring the non-equilibrium model used closer to the equivalent equilibrium model (Novak, 2019). Massman (2015) described two formulations for  $S_v$ , one of which was based on Novak (2012) which assumed pore diffusive resistance alone to be limiting to within-pore diffusion but the two formulations were not compared directly. An improved and fully physically-based version of the Novak (2012) model is derived in Novak (2019).

**RESPONSE - 4** *No change could be made.* *As I discussed above in my Response 2.3b above the only extra*

resistance that might be missing from my model is a soil pore surface boundary layer resistance. Otherwise for the present purposes the principal difference between Novak (2012) and Novak (2019) is an improved definition of the transfer function he calls  $h_v$ . From my perspective this improvement in  $h_v$  and the concomitant improvement in M Novak's  $S_e$  (my  $S_v$ ) results from a better description of  $A_{wa}$ . Otherwise as I see it Novak (2012) and Novak (2019) follow the same paradigm for developing  $F_{pore}$  and therefore there really is a minimal difference between the two Novak models. But as I suggest in Responses 2.3d and 3.2 above including or excluding the storage term is an important aspect of (and difference between) my model and Novak's model that maybe should be discussed in the revisions.

**MN - 5** The importance of changes to the  $S_v$  formulation [lines 144–154, including Eqs. (9) and (10)] to model behavior is difficult to assess because no information about the depth of and water content within the modeled evaporation zone is reported. The changes were apparently confined to  $\theta < 0.01$  (based on  $S_w \approx 0.02$  and porosity of 0.51) which if confined to the dry layer above the evaporation front would have no effect since  $S_v \approx 0$  there. The temperature measurements and model calculations (Figure 6) show values well above boiling for the upper 5 cm of soil at least and the soil in that part of the dry layer has essentially zero water content. Line 150 indicates that  $S_v$  is changed only when at most a mono-layer of water exists on the soil particle surfaces. I would expect that little evaporation can occur from such surfaces and they must have been located in the dry layer. If this is true then explanation of the better model stability and performance due to the changes in  $S_v$  indicated in the Abstract is difficult to understand because the changes would have negligible effect.

**RESPONSE - 5** No change was made. I agree that very little evaporation takes place when  $S_w \approx 0.02$  (or  $\theta < 0.01$  for MEF soils). But my purpose was not to improve evaporation per se, but to allow condensation to proceed more naturally by removing the constraint imposed on condensation by the condition that soil moisture had to be present for condensation to occur. This is the basic physics and logic behind the slight change in  $A_{wa}(\theta)$  to  $A_{wa,dry}$  when modeling condensation. The consequences of this change to model performance is admittedly slight and certainly much smaller than the variations in the model's solution associated with alterations and sensitivity analyses of other model processes and parameters.

**MN - 6** There is no recognition of the issue of not imposing equilibrium at the soil surface (lines 236–243) in the most general version of a non-equilibrium model which requires a Robin type boundary condition for vapor density (see Novak, 2019, for a detailed discussion).

**RESPONSE - 6** No change was made. **(Personal Note - Can the word 'which' be dropped from this sentence?)** I am a bit uncertain in how to respond here. Novak (2019) says (within the first five lines after his Equation (29)): "However, simulations with this condition, although they agreed with the equilibrium solution to within about 5%, demonstrated significant numerical error for  $\rho_v$  and  $S_e$  near the soil surface. There was no time to investigate this further, so a more conservative surface boundary condition was adopted,  $h_r(0, t) = h_{req}(0, t)$ , with  $h_{req}$  given by (5), i.e., equilibrium was imposed at the soil surface." **(Personal note - Part of my confusion results from the impression here that M Novak is (or at least was in 2019) mystified by the numerical instability caused by not imposing equilibrium at the soil surface. Has he uncovered a reason for this instability since the 2019 publication?)** Assuming this quote from Novak (2019) is the origin of his present comment. Then, yes, I am fully aware that some care must be made when imposing the surface boundary condition on  $\rho_v$ . In my model this is accomplished principally by adjusting  $C_U$  and  $C_E$  of my Equation (17) to maximize the rate of evaporation without destabilizing the

model. I mentioned this in my discussion after my equation (17). I did not dwell on this in the present manuscript, but this boundary condition-related-instability occurred in both the 2012 and 2015 models and was resolved in a similar fashion for both. Finally, all version of the model equate  $E_0$  of Equation (17) = the flux at the atmospheric side with at the top the sum of the advective and diffusive fluxes on the soil side of the soil surface.

**MN - 7.1** It is likely that the small effect that was found upon elimination of the double counting of vapor distillation (lines 155–196), reported in the Abstract as a major improvement to the Massman (2015) model, is due to the fact that the double counting was quantitatively important only within the narrow evaporation zone. Therefore soil temperatures in most of the domain are not affected very much.

**RESPONSE - 7.1** A change was made. Dropping the double counting of vapor distillation in  $\lambda_s$  also changed the relative weighting between conduction ( $\lambda_s$ ) and the heat storage ( $C_s$ ), so the effect extended throughout the model domain. But obtaining a comparable solution after dropping the double counting also required recalibrating  $\lambda_{m0}$  (Response 7.2 below). This then minimizes the difference between the model's performance before and after dropping the double counting. In the Abstract (Line 10) I now say that eliminating the double counting improved the *physics underpinning the model*.

**MN - 7.2** Other changes to soil thermal conductivity include accounting for a large effect (as much as a 70% decrease) of temperature on the thermal conductivity of the mineral component based on that of  $\alpha$ -quartz although there is no discussion about the mineral fractions in the soil and whether they are dominated by quartz sand. The soil is reported to be 60–65% sand, 20–25% silt, and 10–15% clay. Do any other soil mineral components behave similarly to quartz? In Massman (2012) the large effect of temperature on volumetric heat capacity (due to both mineral and water component variations) is included. For thermal conductivity apparently only the dependencies of the water and air components on temperature are accounted for but not that of the mineral component. This is maintained in Massman (2015). For normal conditions these dependencies on temperature are usually small enough to be neglected but under fire they appear to be significant especially given that the thermal regime is of greatest interest. Modification of  $R_p$  in the Bauer term is reported but it is also indicated that the thermal infrared contribution to heat flow is negligible anyway.

**RESPONSE - 7.2** A Change was made. Except for his question, “Do any other soil mineral components behave similarly to quartz?”, M. Novak's comment here are largely descriptive and I basically agree with his conclusions, except possibly for “For normal conditions these dependencies on temperature are usually small enough to be neglected”.

To answer his question Lines 209-215 of the manuscript now read: **“At the Manitou Experimental Forest (MEF) burn site, and more generally throughout the region surrounding MEF, sand quartz is likely to be the dominant soil mineral, but other crystalline mineral forms, such as granite and feldspar are also common (e.g., [Retzer (1949)], [Mathews (1900)], [Smith et al. (1999)]). Although the thermal conductivities associated with these other mineral forms also decrease with increasing temperature ([Heuze (1983)], [Mottaghy et al. (2008)], [Miao et al. (2014)]), overall they decrease with about half the slope ( $\partial\lambda_m/\partial T$ ) of the sand quartz parameterization used here. They also tend to show a much lower  $\lambda_{m0}$  than quartz sand. Here  $\lambda_{m0} = 4.42 \text{ Wm}^{-1}\text{K}^{-1}$ , which should help accommodate these other non-sand quartz mineral forms.”**

Regarding M Novak's supposition about the temperature dependencies of the soil's thermophysical

properties at normal conditions. The sensitivity ( $\partial/\partial T$ ) of this dependency can be estimated. From a review of papers and reports (some published, some unpublished, and including Massman (2012)) and depending on soil type the volumetric specific heat for dry soil can increase by between about 7 and 25% when the temperature increases from 0-50 C, while  $\lambda_m$  decreases between about 10 and 25%. So for relatively dry soils these temperature dependencies may well be significant under more normal temperatures, especially as they act synergistically to widen the difference in how incoming energy is partitioned between storage ( $C_s$ ) and conduction ( $\lambda_s$ ). Therefore, I cannot conclude a priori that their combined effects can always be neglected.

**MN - 8.1** The large model complexity in this paper, which often requires referral to Massman (2012, 2015) to fully understand, makes it difficult to read and the meaning of the results somewhat incomprehensible.

**RESPONSE - 8.1** I have tried to eliminate some of this by including more references and discussion. But I also want to keep repetition to a minimum. Possibly I have been too aggressive with this. But as I have said in several places throughout this response that there are other revisions I am willing to undertake (but have not done so at this point) that may also help address M Novak's concern here.

**MN - 8.2** The physics of the various components is generally not new except for perhaps the non-equilibrium part which has been shown to be unnecessary.

**RESPONSE - 8.2** I agree that the physics is not new. But at this point I am not convinced that the "non-equilibrium part is unnecessary" (also please see my **Response - 2.3a** regarding the modeling results of [Baser et al. (2018)]). In fact I think exploring the differences between equilibrium and non-equilibrium models has brought further insights into the dynamics of soil evaporation, as well as an improved understanding (and performance) of models of coupled soil heat and moisture flow during fires (and maybe even to such models under less extreme heating). I think there is still some research that needs to be done on the role that the storage term,  $\partial\rho_v/\partial t$ , plays in modeling coupled heat and moisture flow in soils before concluding that "the non-equilibrium part has been shown to be unnecessary".

**MN - 8.3** I wonder whether including every process imaginable in such a model is warranted and even helpful given the uncertainties of fire under field conditions and associated measurement difficulties.

**RESPONSE - 8.3** I do not want to assume, a priori, that just because a particular physical process or parameterization is negligible under more normal conditions that it is equally negligible at very high temperatures. Unfortunately, instrument limitations and the associated uncertainties are always a hazard with observational field work. But this does not preclude me from comparing the model simulation with observations in an effort to evaluate the importance of physical processes that may be important under these extreme conditions.

**MN - 8.4** Despite the many processes the model still required a number of tuning parameters. Under normal field conditions many processes, e.g., storage of water vapor, advection of heat by air and water flow and water vapor by air flow, and heat of wetting are known to be of negligible importance and do not have to be included in coupled heat and moisture flow models (Griffoll, 2013\*; Novak, 2010\*, 2016\*). This may not remain true under more extreme fire conditions but order-of-magnitude calculations could be used to determine this.

**RESPONSE - 8.4** Yes the model does include several tunable parameters. And I concur under more normal field conditions many processes are known to be negligible. But as I discuss in my Response 2.3d the storage term ( $\partial\rho_v/\partial t$ ) may not be negligible when the soil is being heated during a fire. Otherwise I

*include many of these processes in order to test for their significance to the solution and because it is physically reasonable to do so.*

**MN - 8.5** The upper boundary conditions are especially uncertain in this paper since they require proper understanding of how the slash pile burns including analysis of air flow within and above the pile. I am skeptical about the temperature boundary condition used in the paper. According to Figure 4 sensible heat flux was positive throughout the fire experiment while the picture in Figure 2 suggests a pile with internal temperatures of about 1000° C so that there likely was a steep temperature inversion above the soil surface and therefore the sensible heat flux must have been negative (downward). Despite this the modeled soil temperatures are reasonable, presumably a testament to empirical parameter tuning.

**RESPONSE - 8.5** *A Change was made. & A further change could be made. Yes, the upper boundary conditions (in general) and the temperature boundary (in particular) are uncertain. And I emphasized this at length in Section 4.1 (sensitivity analysis for the upper boundary condition). But that said, I also pointed out in section 2.5.1 (complexities of formulating the surface energy balance and the upper boundary condition) that the upper boundary condition and the formulation of the surface energy balance may depend on the type of fire one is trying to simulate. And I think that including Figs. 2 and 3 (see my Response - 11 below) with any revisions would help exhibit some of these concerns about the upper boundary condition. Overall, I think there is more than enough evidence to support that this singular fire and data set cannot represent all possible fires and all possible boundary conditions. Nevertheless, I can still test the performance of these boundary conditions using this pile burn data set.*

*But for further clarification, I have added the following two sentences (Lines 296–300) to the manuscript: “Further complicating a proper formulation of the soil surface IR and convective heat flow terms are the structure and porosity of the pile, which will influence the IR impinging on the soil surface, the air flow ventilating the pile interior, and the size and efficiency of any convective eddies that may act to transfer heat to or away from the soil surface. In this study the upper boundary condition for temperature ( $T_a(t)$  and  $C_H$ ) is chosen to insure that the convective heat flow is away from the soil surface.”*

**MN - 8.6** Actually since surface temperature was measured in the experiment it could just as well (or even better) have been used as the upper (Dirichlet) boundary condition to the heat flow equation.

**RESPONSE - 8.6** *A Dirichlet upper boundary condition has always been a possibility. But to date I have chosen not to explore this approach.*

## **Specific comments**

**MN - 9** What is the physics underlying Eq. (5) (line 117)? Is it Stefan flow? Grifoll (2013\*) included not only Stefan flow in his heat and moisture transport study but also the mechanical dispersion associated with it. He found that this dispersion affected vapor flow in the dry layer although the effect on evaporation rate from the soil was small. The physics he described was sound but the effect of dispersion was probably exaggerated because the assumed longitudinal dispersivity was likely too large. Eq. (5) is similar to a differentiated form of Eq. (12) in Grifoll (2013\*).

**RESPONSE - 9** *A change was made. The physics underlying Eq. (5) (line 117) is (as stated in the present manuscript) that “ $u_{vl}$  ( $m s^{-1}$ ) is the advective velocity induced by the change in volume associated with the rapid volatilization of soil moisture”. This is not necessarily a diffusive or Stefan flow advective velocity. Fundamentally it is more like an explosion. The current  $u_{vl}$  is an update of the model*

parameterization used by Campbell et al. (1995). In Massman (2012, 2015) I referenced [Ki et al. (2005)] for further details. I have added this reference (Line 133) to the present manuscript, which now reads “ $u_{vl}$  ( $m s^{-1}$ ) is the advective velocity induced by the change in volume associated with the rapid volatilization of soil moisture (e.g., [Ki et al. (2005)]), ...”. That said I am not completely satisfied that this is the best or most appropriate model for  $u_{vl}$ , which is why I included the discussion of a different formulation for  $u_{vl}$  in Section 5 “Improving physical realism: ...”.

**MN - 10** It is well known that the greatest limitation to evaporation from soil is soil hydraulic conductivity (Hanks and Gardner, 1965\*; Grifoll, 2013\*). For the standard environmental temperature range (10–60° C) both the hydraulic conductivity and soil water retention curves vary significantly with temperature (the former through the viscosity of water and the latter through surface tension; however measured retention curve variations are usually larger than expected from surface tension alone which is not yet understood) Accounting for these temperature variations in actual modeling is not always important (Milly, 1984\*). There is no indication whether the temperature dependencies of the hydraulic properties (lines 303–341) are included in the model. For the larger temperature range under surface fire it might be important.

**RESPONSE - 10a** A change was made. With regards to the hydraulic functions, the temperature dependency of the viscosity of water ( $\mu_w$ ) is included in the present model. So the hydraulic functions are temperature dependent and I noted this on the line following Equation (3) of the manuscript, which states: “where  $\mu_w = \mu_w(T_K)$ ”. The Line 118, which follows Equation (3) now reads “ $\mu_w = \mu_w(T_K)$  (Pa s) [Huber et al. (2009)]”. But unless film flow is included in the hydraulic functions (see section 2.2.5 (page 3666) of Massman (2015)) the hydraulic functions do not include surface tension ( $\sigma_w$ ) effects. The inclusion of film flow had little impact on the present model’s performance or any resulting simulation. This is the same thing I found in Massman (2015), so I did not discuss film flow in the present study.

**RESPONSE - 10b** A change was made. With regards to the WRC, I agree that it is worthwhile to investigate the possible influence of temperature on the WRC. So I have added the following paragraph to address this.

Lines 367–379 now read: **Additionally, temperature can also have significant effects on the WRC (e.g., [Olivella and Gens (2000)], [Salager et al. (2010)]), a consequence of the influence temperature has on the surface tension of water ( $\sigma_w = \sigma_w(T_K) Nm^{-1}$ ) [Vargaftik et al. (1983)]. Massman (2012) found that these effects were relatively small, even at very high temperatures, but his 2012 model did not include any possibility of soil water movement (i.e., no hydraulic functions). [Milly (1984)] includes the temperature effects on both the WRC ( $\sigma_w$ ) and the hydraulic functions ( $\mu_w$ ) and likewise found little effect, but his study was restricted to relatively normal soil temperatures (i.e.,  $T \leq 60$  C). Here the impact this temperature dependency ( $\sigma_w$ ) has on the WRC and the model solution was investigated by multiplying the model variable  $\psi_n$  of Equation (19) by the function  $\phi_n(T_K) = \sigma_w(T_{K,in})/\sigma_w(T_K)$ , which ensures that  $\partial\theta/\partial T_K < 0$  in accordance with observations (e.g., [Olivella and Gens (2000)], [Salager et al. (2010)]) and that  $\phi_n$  is consistent with theoretical considerations and similar to other model parameterizations (e.g., [Milly (1984)], [Zhou et al. (2014)]). It also ensures that  $\phi_n = 1$  at the beginning of the model simulation. The results suggested that temperature has only a minor influence on the WRC and the model solution and because the model’s sensitivity to  $\phi_n$  is small compared to the model’s sensitivity to changes in other parameters and parameterizations, this issue will not be considered any further in this study.**

**MN - 11** No qualitative indication is given as to how the fire evolved over time (lines 361–374), i.e., for how long the fire burned intensively as in Figure 2. Was there a period in which just glowing ashes existed? It would be useful to the reader to have a feeling for what happened. A time series of photos would be ideal.

**RESPONSE - 11** *A change was made. & A change could be made. Here I attach two photos taken after Figure 2 of the present manuscript. The time sequence is as follows: Fig. 2 (present manuscript) was taken approximately 25 minutes after the fire was started, the next figure (Fig. 2 below) was taken about 75 minutes after ignition, and the third (Fig. 3 below) was about 195 minutes after ignition. I am certainly willing to include these images in the paper and to discuss their implications to the modeling, the upper boundary conditions and surface energy balance (also see my Response 8.5 above) if the editor and the reviewers feel that it would be helpful. I also changed the caption on Figure 2 of the present manuscript to read “Layout of the data system and slash pile of the Manitou Experimental Forest 26 April 2004 experimental burn **about 25 minutes** after ignition.”*



# Bibliography

- [Başer et al. (2018)] Başer, T., Dong, Y., Moradi, A. M., Lu, N., Smits, K., Ge, S., Tartakovsky, D. and McCartney, J. S.: Role of nonequilibrium water vapor diffusion in thermal energy storage systems in the vadose zone, *J. Geotech. Geoenviron. Eng.*, 144(7), 04018038, doi:10.1061/(ASCE)GT.1943-5606.0001910, 2018.
- [Clifton et al. (2020)] Clifton, E. O., Fiore, A. M., Massman, W. J., Baublitz, C. B., Coyle, M., Emberson, L., Fares, S., Farmer, D., Gentine, P., Gerosa, G., Guenther, A., Helmig, D., Lombardozzi, D., Munger, W. J., Pusede, S., Schwede, D., Silva, S., Sörgel, M., Steiner, A., and Tai, A.: Dry deposition of ozone over land: processes, measurement and modeling, *Reviews of Geophysics*, 58(1), doi:10.1029/2019RG000670, 2020.
- [Dayan (1982)] Dayan, A.: Self-similar temperature, pressure and moisture distribution within an intensely heated porous half space, *J. Heat Trans.*, 25, 1469–1476, doi:10.1016/0017-9310(82)90025-4, 1982.
- [Heuze (1983)] Heuze, F. E.: High-temperature mechanical, physical and thermal properties of granitic rocks – a review, *Int. J. Rock Mech., Min. Sci. & Geomech. Abstr.*, 20(1), 3–10, doi:10.1016/0148-9062(83)91609-1, 1983.
- [Huber et al. (2009)] Huber, M. L., Perkins, R. A., Laeseche, A., Friend, D. G., Sengers, J. V., Assael, M. J., Metaxa, I. N., Vogel, E., Mareš, R., and Miyagawa, K.: New international formulation for the viscosity of H<sub>2</sub>O, *J. Phys. Chem. Ref. Data*, 38, 101–125, doi:10.1063/1.3088050@jpr.2019.IWPS2019.issue-1, 2009.
- [Ki et al. (2005)] Ki, H., Mohanty, P. S., and Mazumder, J.: A numerical method for multiphase incompressible thermal flows with solid-liquid and liquid-vapor phase transformations, *Numerical Heat Transfer, Part B: Fundamentals*, 48, 125–145, doi:10.1080/10407790590963596, 2005.
- [Mathews (1900)] Mathews, E. B.: The granitic rocks of the Pikes Peak quadrangle, *The Journal of Geology*, 8(3), 214–240, doi:10.1086/620795, 1900.
- [Miao et al. (2014)] Miao, S. Q., Li, H. P., Chen, G.: Temperature dependence of thermal diffusivity, specific heat capacity, and thermal conductivity for several types of rocks, *J. Therm. Anal. Calorim.*, 115, 1057–1063, doi:10.1007/s10973-013-3427-2, 2014.
- [Milly (1984)] Milly, P. C. D.: A simulation analysis of thermal effects on evaporation from soil, *Water Resour. Res.*, 20, 1087–1098, doi:10.1029/WR020i008p01087, 1984.

- [Mottaghy et al. (2008)] Darius Mottaghy, D., Vosteen, H-D., Schellschmidt, R.: Temperature dependence of the relationship of thermal diffusivity versus thermal conductivity for
- [Olivella and Gens (2000)] Olivella, S., and A. Gens, A.: Vapour transport in low permeability unsaturated soils with capillary effects, *Transport Porous Media*, 40, 219–241, doi:0.1023/A:1006749505937, 2000.crystalline rocks, *Int. J. Earth Sci. (Geol. Rundsch.)*, 97, 435–442, doi:10.1007/s00531-007-0238-3. 2008.
- [Pakala and Plumb (2012)] Pakala, V. K. C., and Plumb, O. A.: High intensity drying in porous materials, *J. Thermal Sci. Eng. Appls.*, 4, 021010, doi:/10.1115/1.4006275, 2012.
- [Retzer (1949)] Retzer, J. L.: Soils and physical conditions of Manitou Experimental Forest, Rocky Mountain Forest and Range Experiment Station, Fort Collins, CO, 37 pp., [www.fs.usda.gov/treearch/pubs/59506](http://www.fs.usda.gov/treearch/pubs/59506), 1949.
- [Salager et al. (2010)] Salager, S., El Youssoufui, M. S., and Saix, C.: Effect of temperature on soil water retention phenomena in deformable soils: theoretical and experimental aspects, *European J. Soil Sci.*, 61, 97–107, doi:10.1111/j.1365-2389.2009.01204.x, 2010.
- [Shuttleworth (1975)] Shuttleworth, W. J.: The concept of intrinsic surface resistance: Energy budgets at a partially wet surface. *Boundary-Layer Meteorology*, 8, 81–99, doi:10.1007/BF02579393, 1975.
- [Skopp (1985)] Skopp, J.: Oxygen uptake and transport in soils: analysis of the air-water interfacial area, *Soil Sci. Soc. Am. J.*, 49, 1327-1331, doi:10.2136/sssaj1985.03615995004900060001x, 1985.
- [Smith et al. (1999)] Smith, D. R., Wobus, R. A., Noblett, J., Unruh, D., and Chamberlain, K. R.: A review of the pikes peak batholith, front range, central Colorado: A “type example” of A-type granitic magmatism, *Rocky Mountain Geology*, 34(2), 93–116, doi:10.2113/34.2.289, 1999.
- [Udell (1983)] Udell, K. S.: Heat transfer in porous media heated from above with evaporation, condensation, and capillary effects, *J. Heat Trans.*, 105, 485–492, doi:10.1115/1.3245611, 1983.
- [Vargaftik et al. (1983)] Vargaftik, N. B., Volkov, B. N., and Voljak, L. D.: International tables of the surface tension of water, *J. Phys. Chem. Ref. Data*, 12, 817-820, doi:10.1063/1.555688, 1983.
- [Zhou et al. (2014)] Zhou, A-N., Sheng, D., and Li, J.: Modelling water retention and volume change behaviours of unsaturated soils in non-isothermal conditions, *Computers and Geotechnics*, 55, 1–13, doi:10.1016/j.compgeo.2013.07.011, 2014.

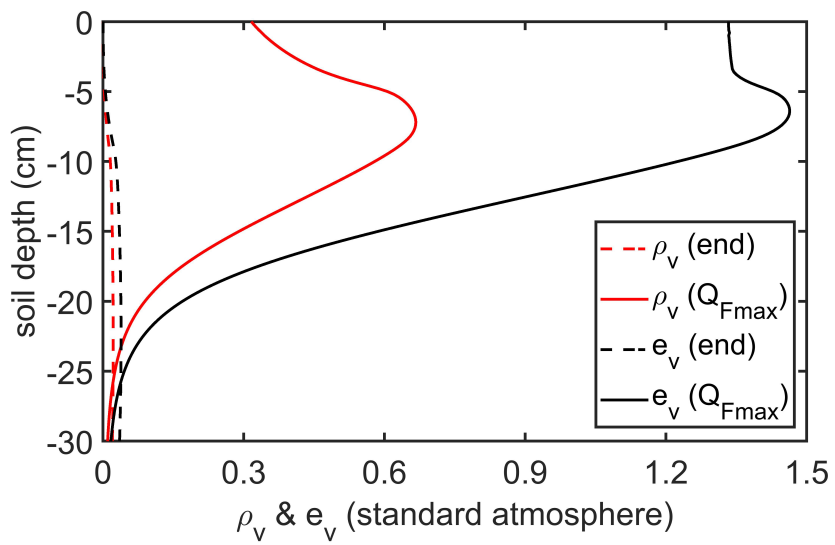

Figure 1: Vertical profiles of modeled soil vapor density ( $\rho_v/1.292$ ) and pressure ( $e_v/101325$ ) in units of standard atmosphere. Profiles correspond to the final profile at the end of the simulation and at the time,  $t_m$ , that the forcing,  $Q_F(t)$ , reaches its maximum.

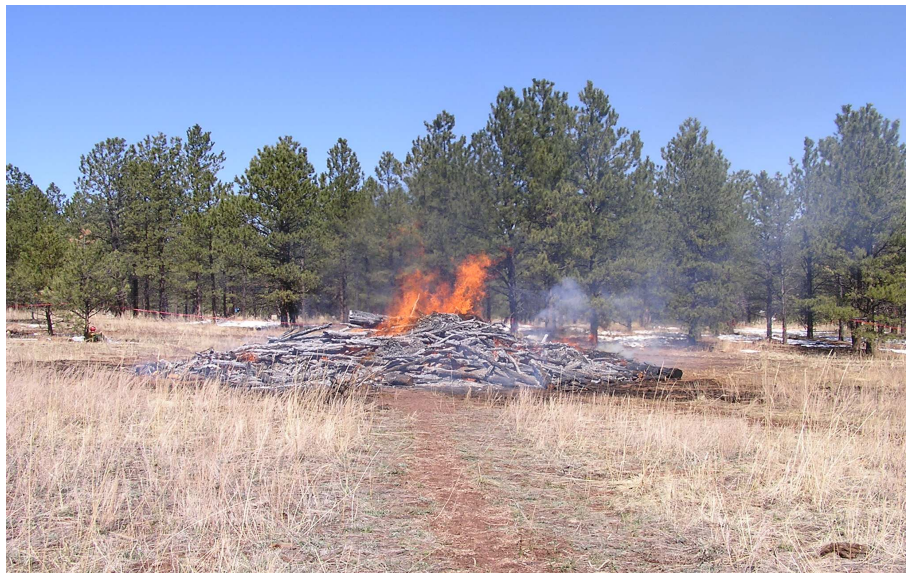

Figure 2: The slash pile of the Manitou Experimental Forest 26 April 2004 experimental burn about 75 minutes after ignition.

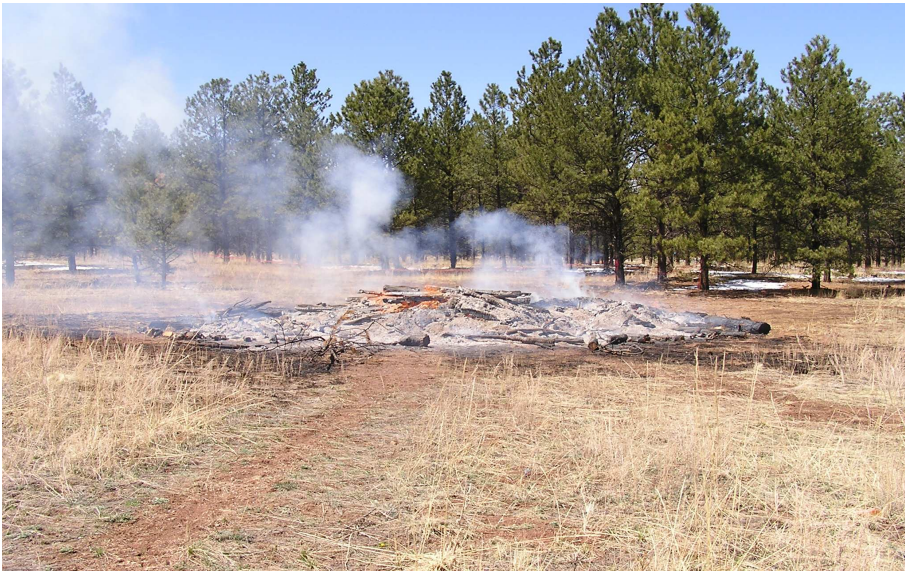

Figure 3: The slash pile of the Manitou Experimental Forest 26 April 2004 experimental burn about 195 minutes after ignition.
